# Supplementary material for: Comparison of chest compression quality in walking versus straddling cardiopulmonary resuscitation during stretcher transportation: A prospective randomised crossover study using manikins
Source: PubMed Central journal article supplement (PMC6528974; doi:10.1371/journal.pone.0216739), 2019-05-21

Participant ID: 1, Height 173cm, Weight 60kg, BMI 20kg/cm, age: 20s, sex: male

### walking CPR

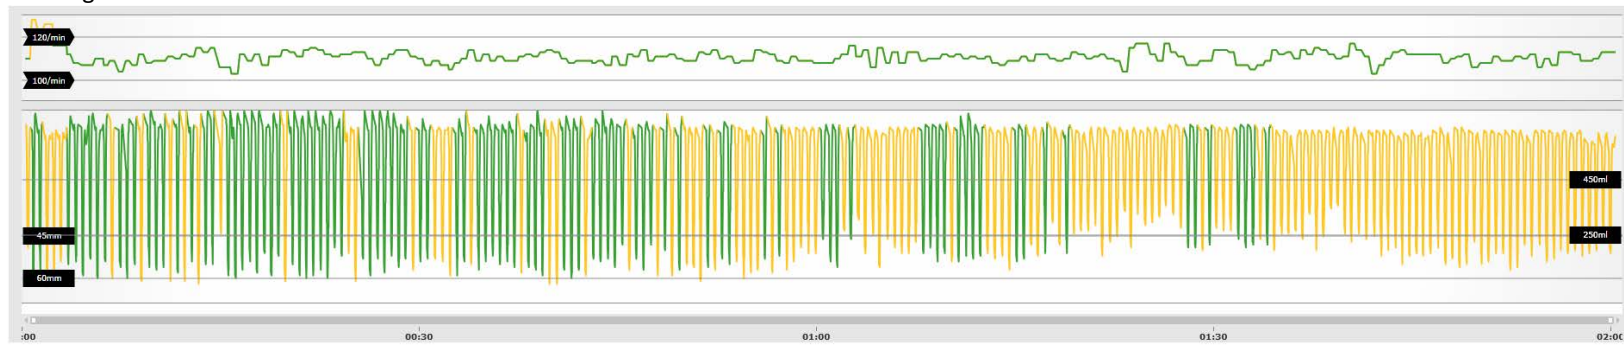

### straddling CPR

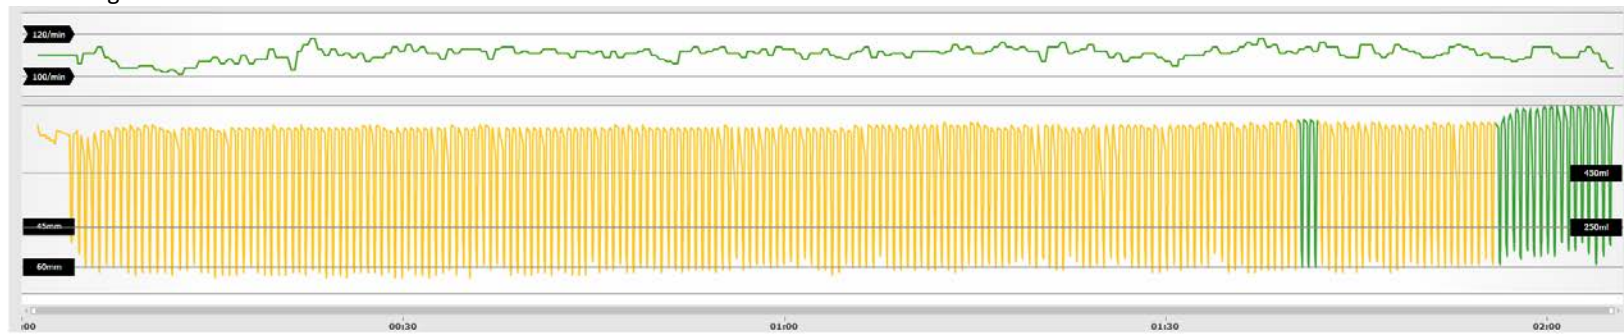

### pretest

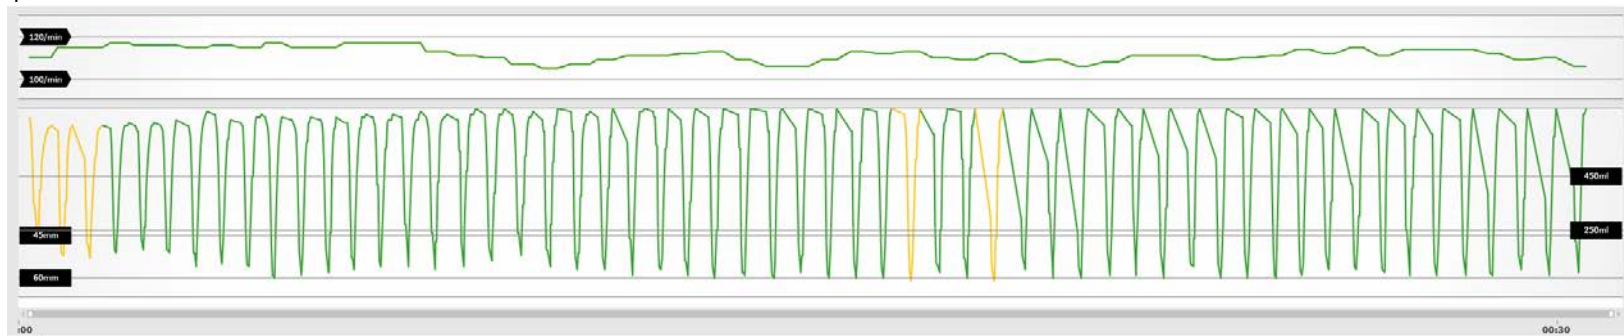

Participant ID: 2, Height 166cm, Weight 66kg, BMI 24kg/cm, age: 30s, sex: male

### walking CPR

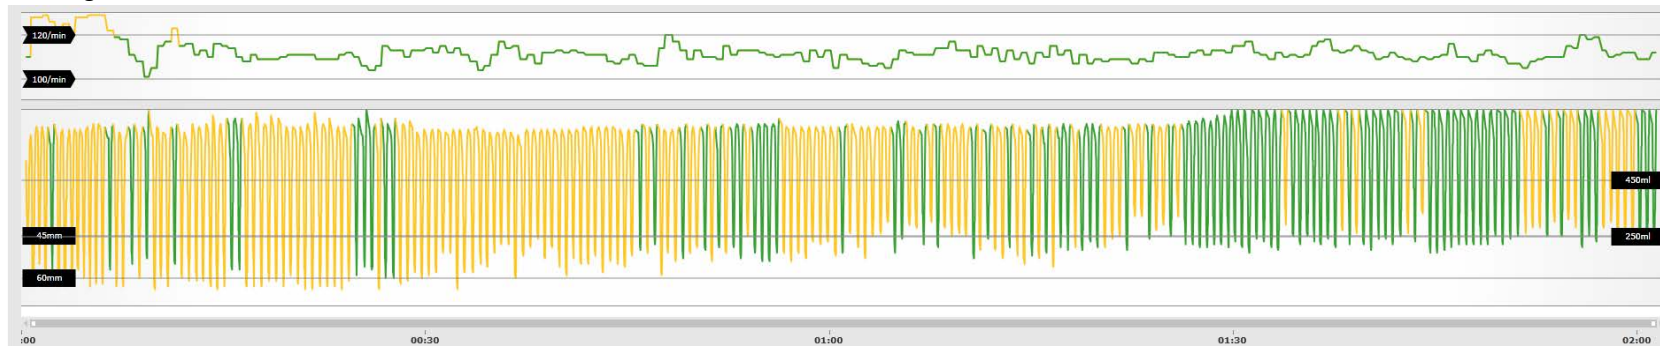

### straddling CPR

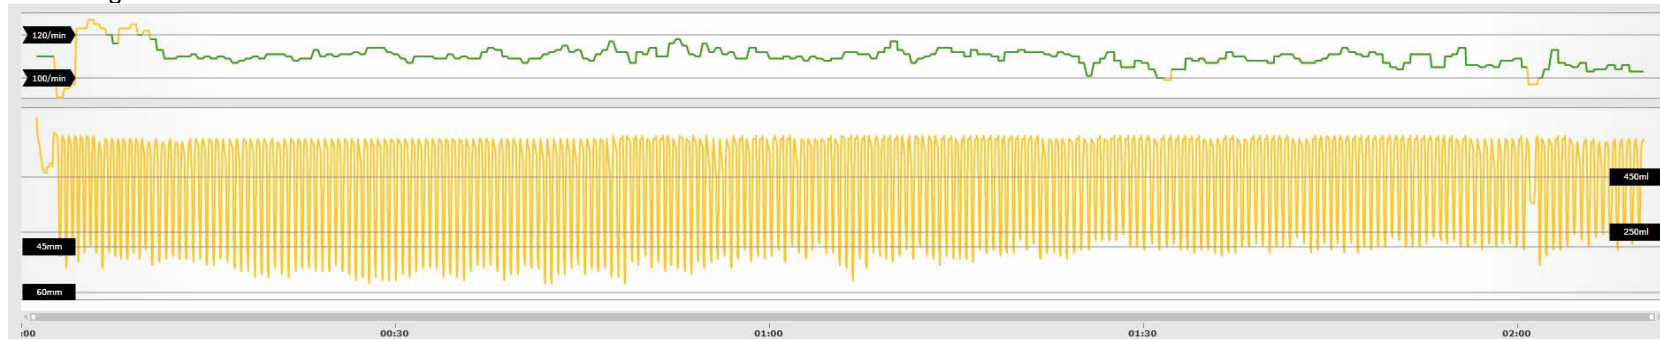

### pretest

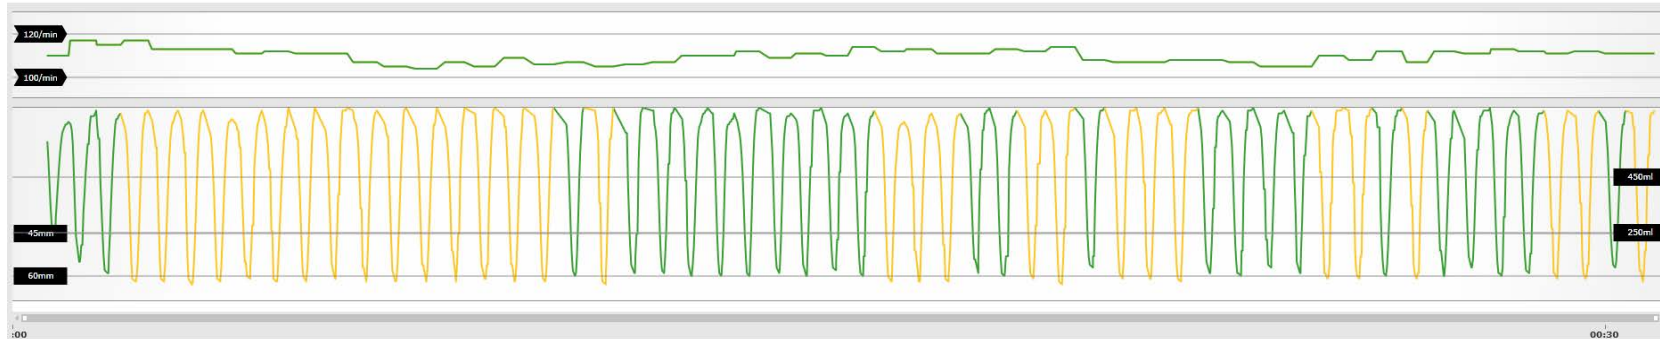

Participant ID: 3, Height 155cm, Weight 47kg, BMI 20kg/cm, age: 40s, sex: female

### walking CPR

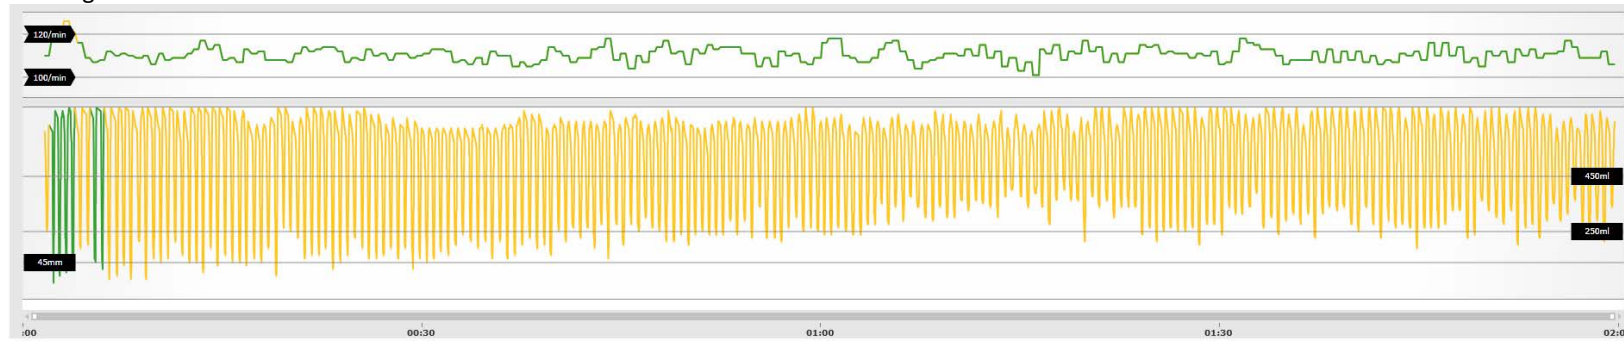

### straddling CPR

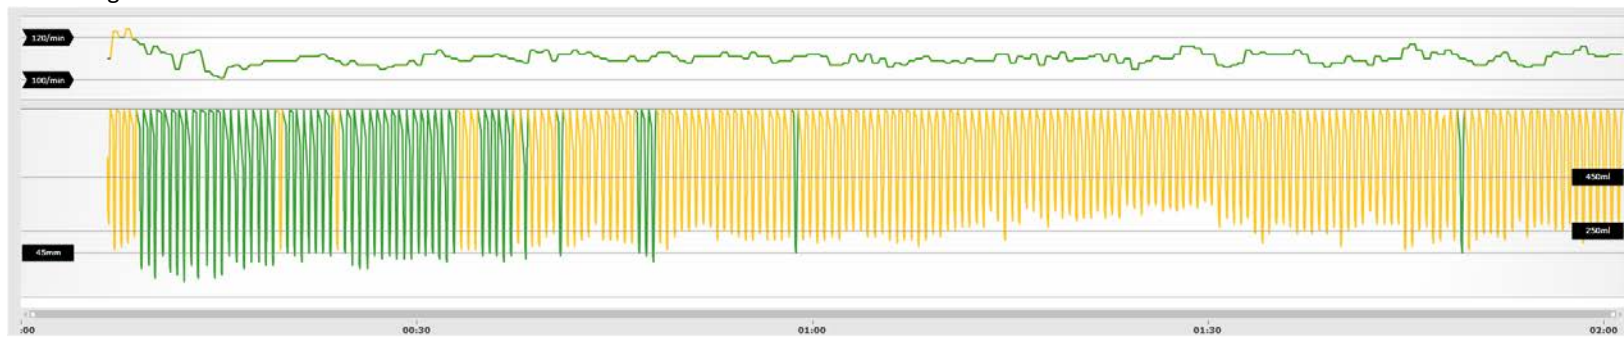

### pretest

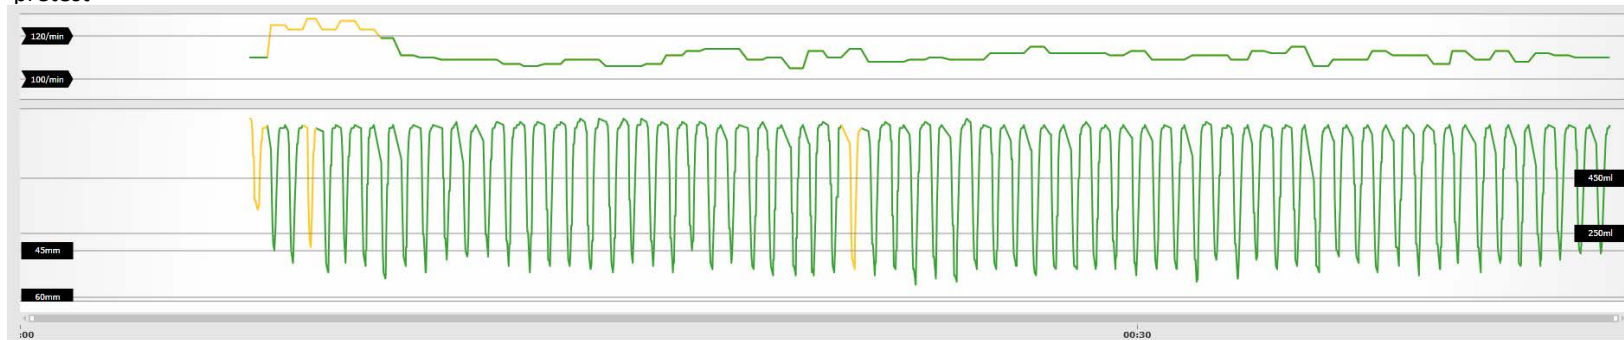

Participant ID: 4, Height 150cm, Weight 58kg, BMI 26kg/cm, age: 30s, sex: female

### walking CPR

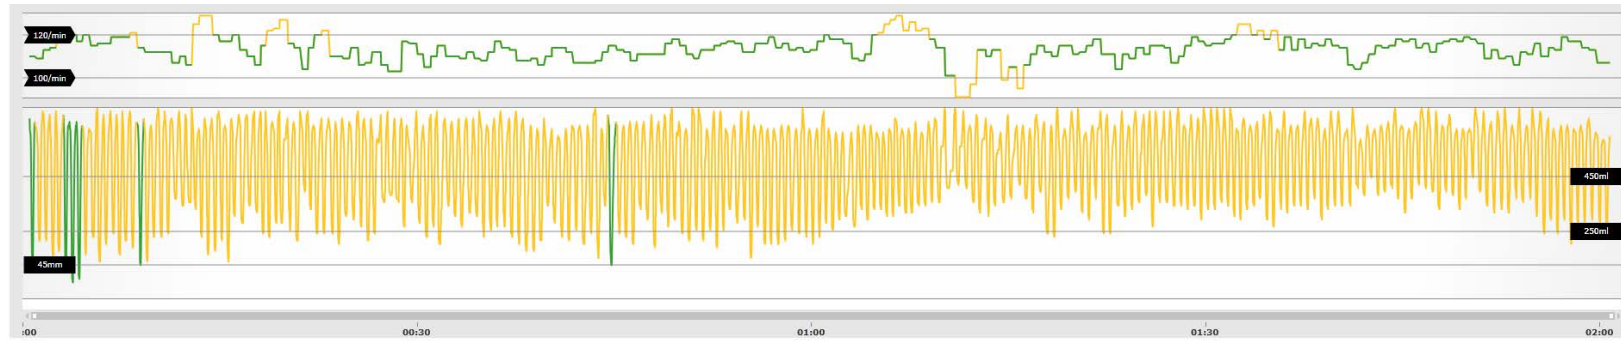

### straddling CPR

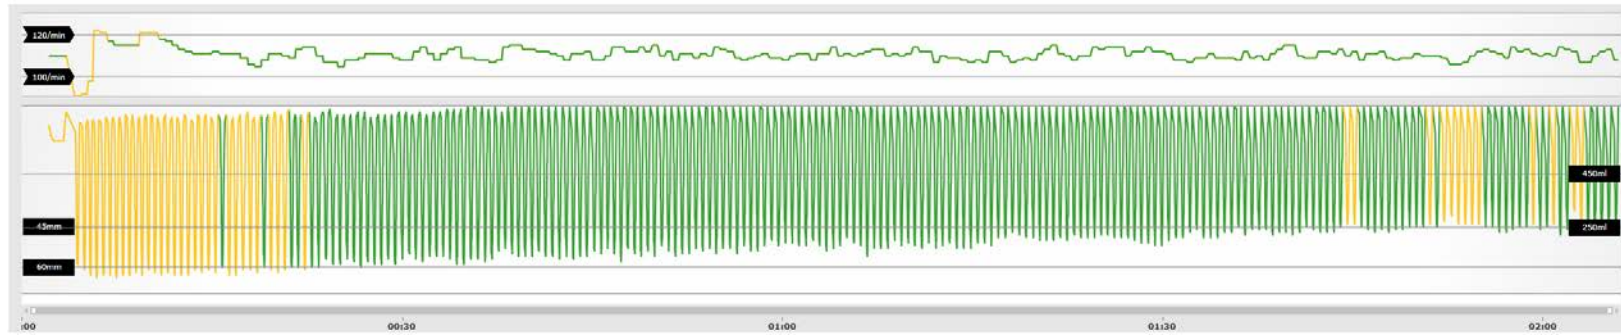

### pretest

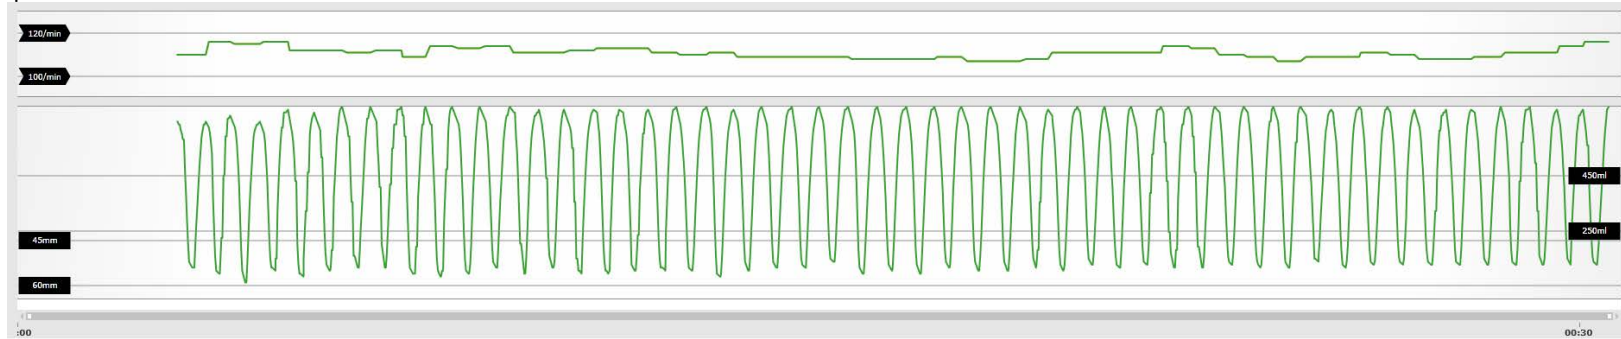

Participant ID: 5, Height 163cm, Weight 52kg, BMI 20kg/cm, age: 30s, sex: female

### walking CPR

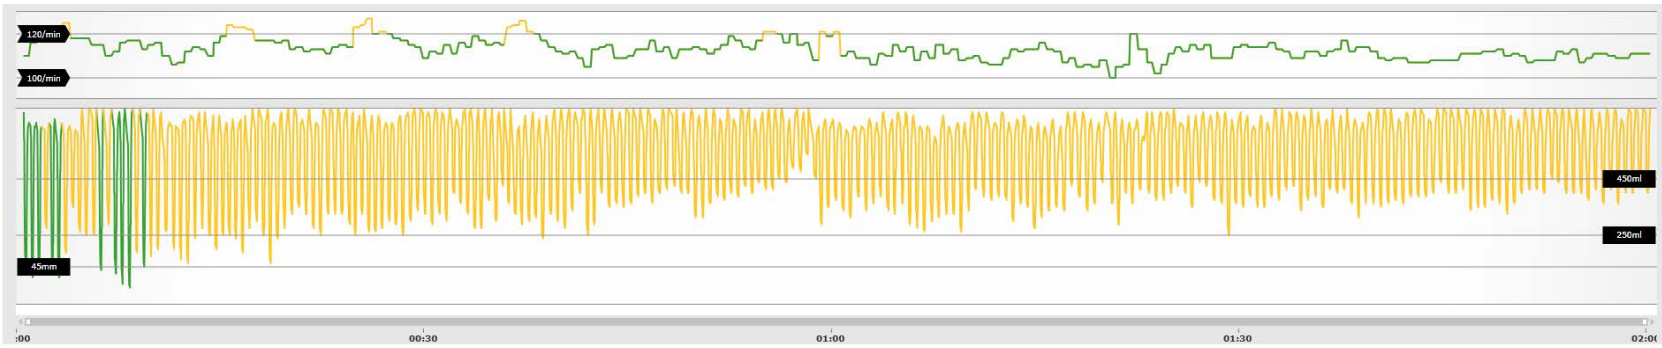

### straddling CPR

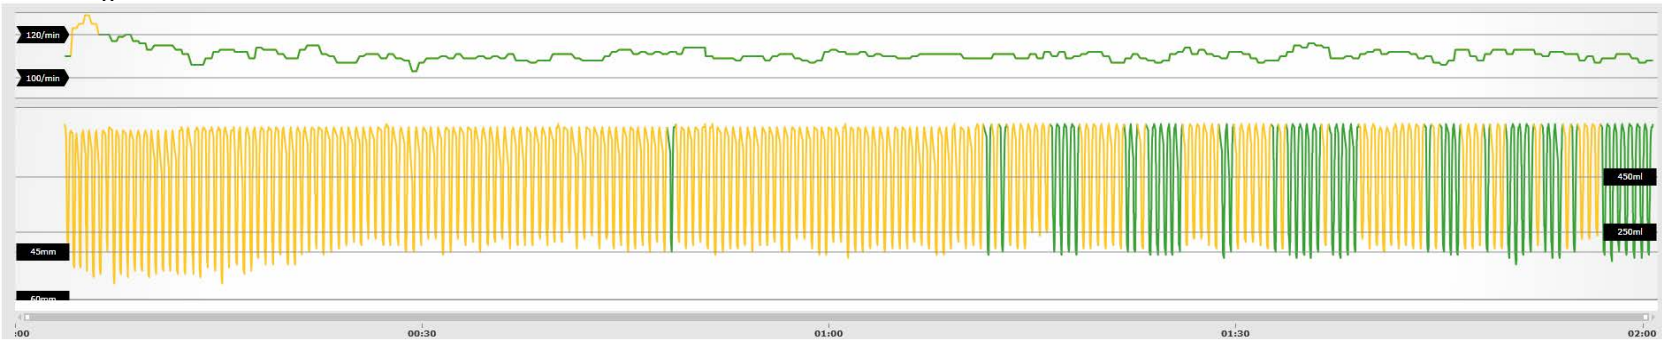

### pretest

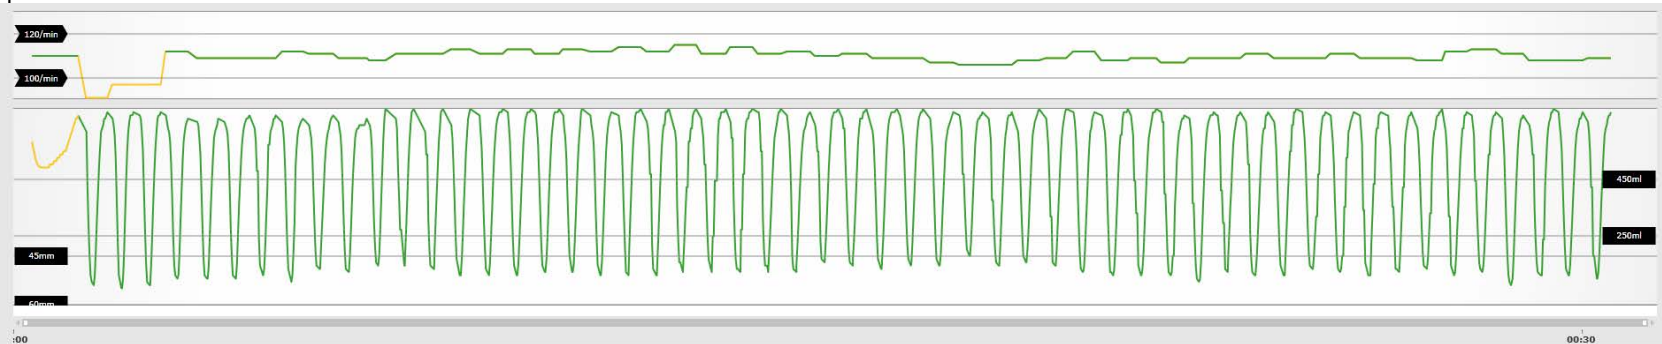

Participant ID: 6, Height 173cm, Weight 68kg, BMI 23kg/cm, age: 20s, sex: male

### walking CPR

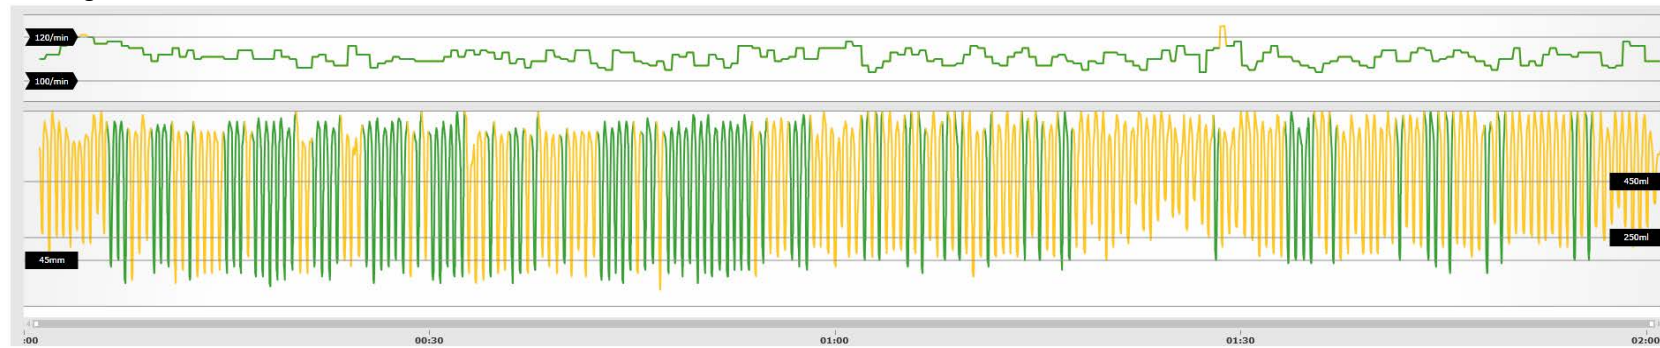

### straddling CPR

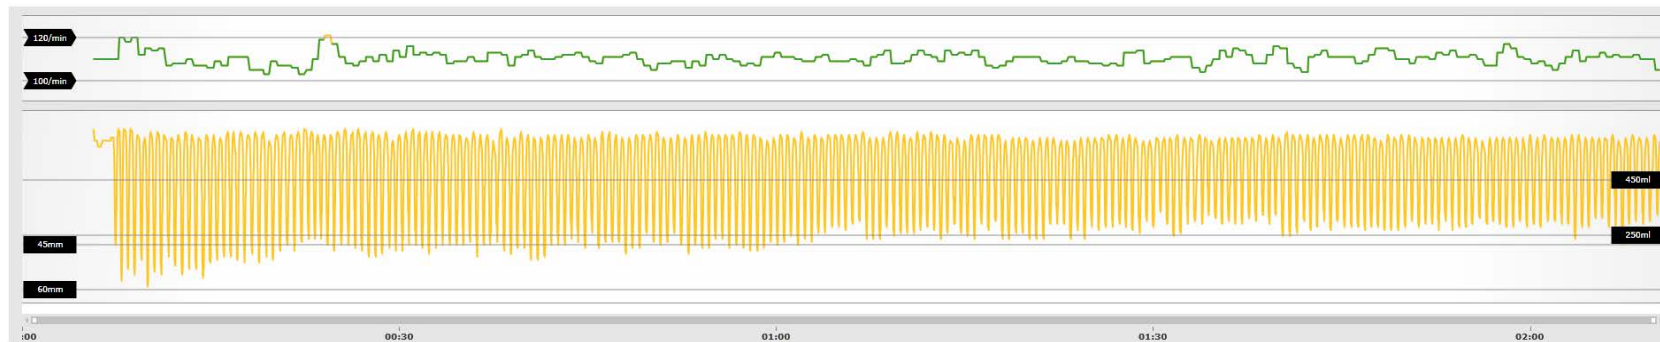

### pretest

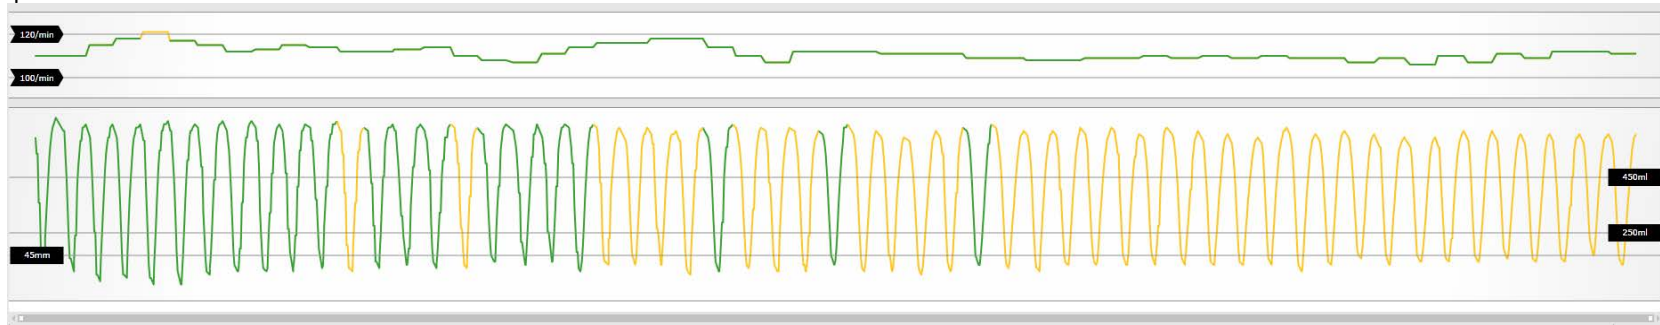

Participant ID: 7, Height 187cm, Weight 69kg, BMI 20kg/cm, age: 40s, sex: male

### walking CPR

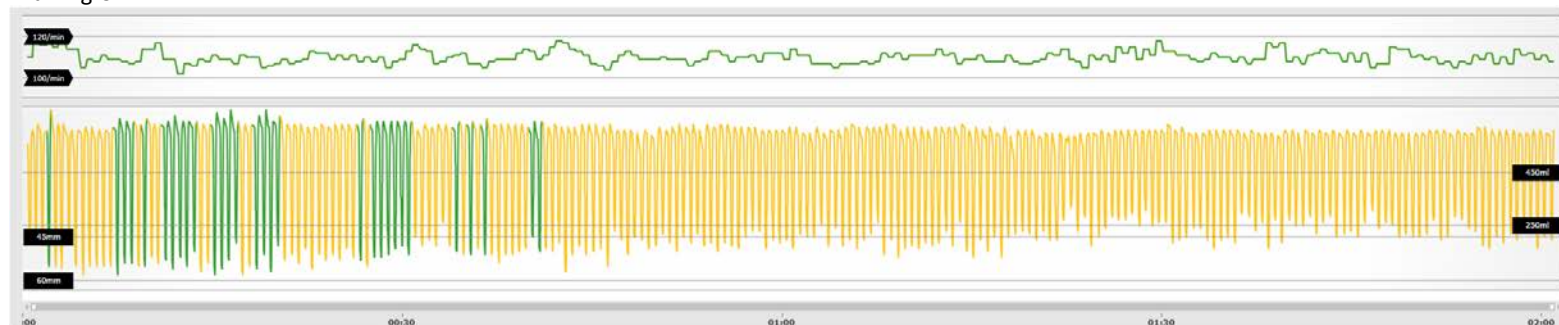

### straddling CPR

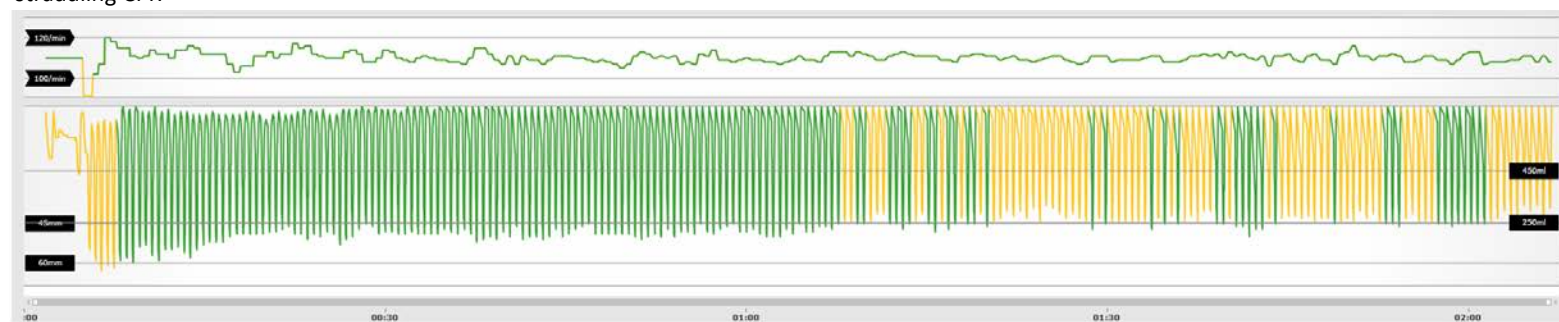

### pretest

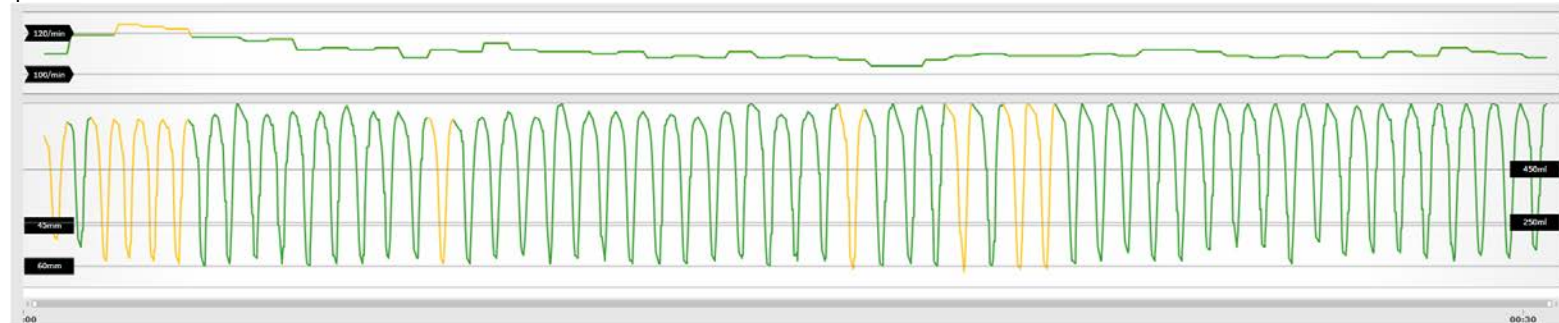

Participant ID: 8, Height 159cm, Weight 56kg, BMI 22kg/cm, age: 40s, sex: female

### walking CPR

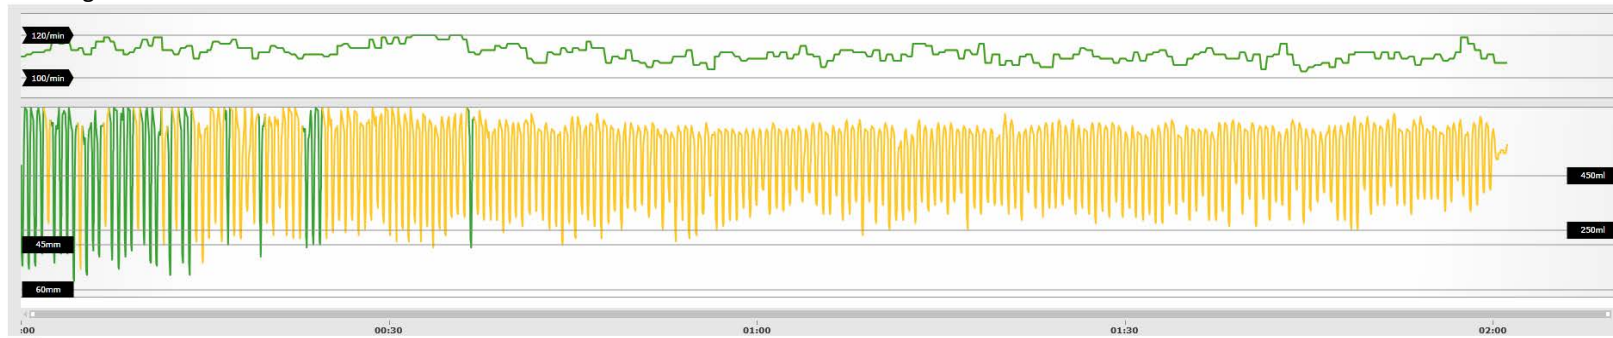

### straddling CPR

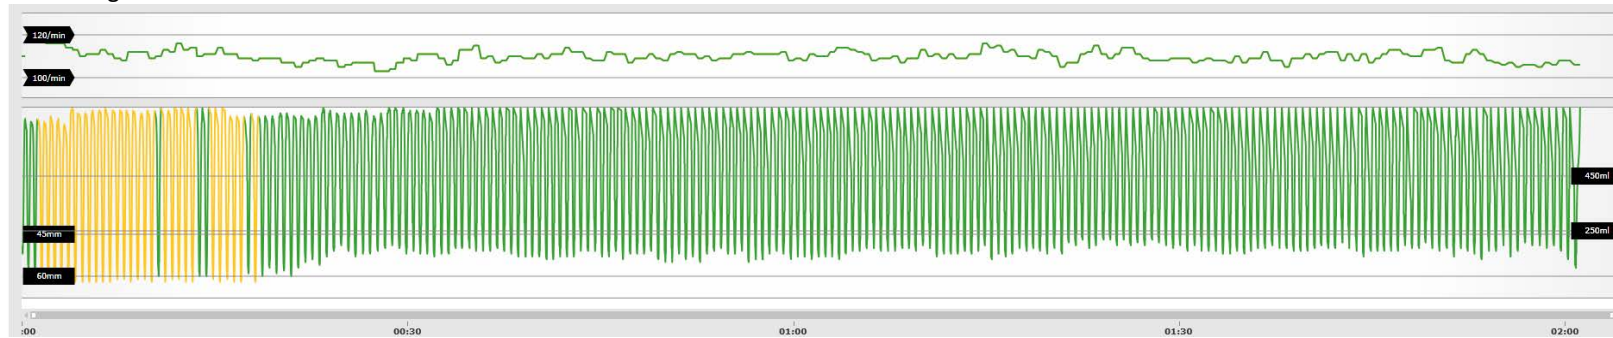

### pretest

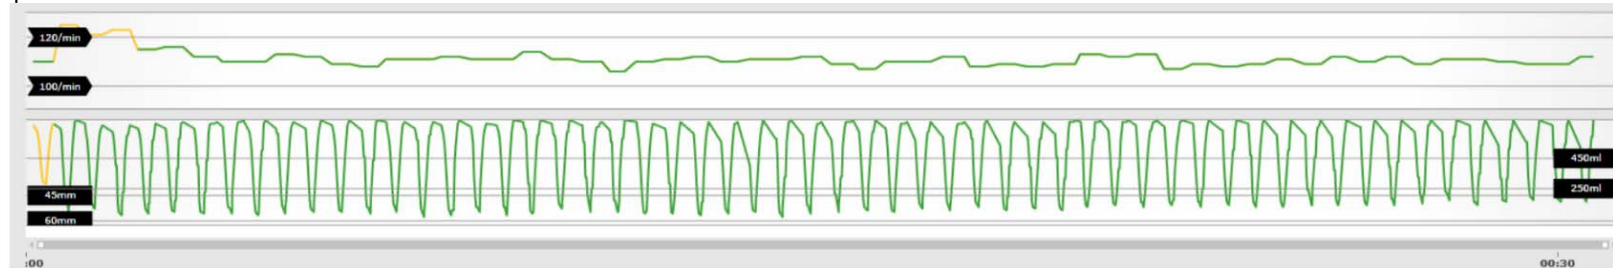



Participant ID: 9, Height 157cm, Weight 52kg, BMI 21kg/cm, age: 30s, sex: female

### walking CPR

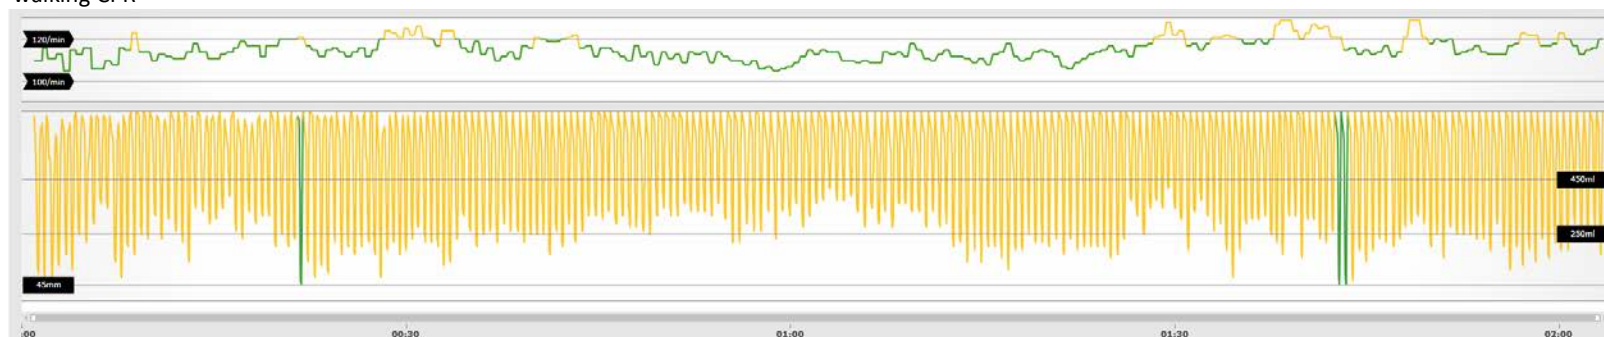

### straddling CPR

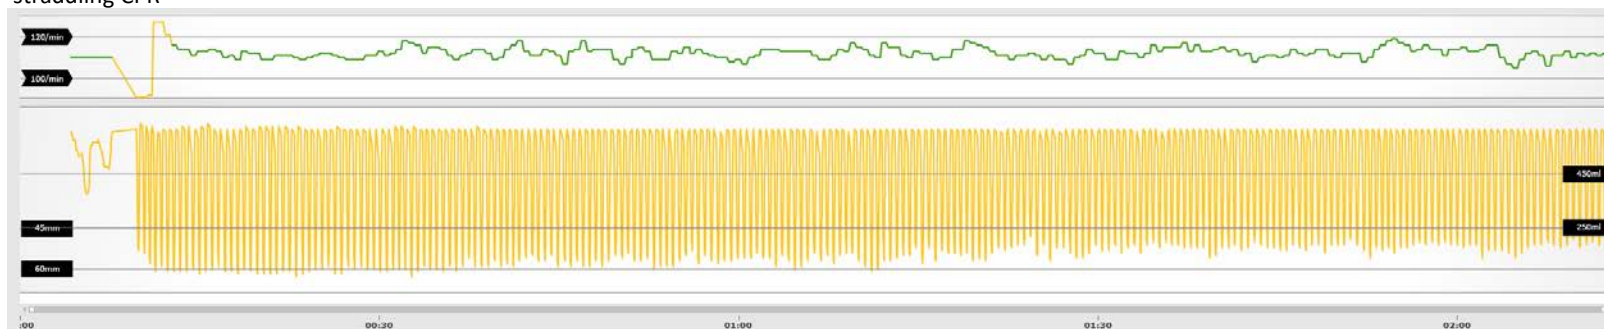

### pretest

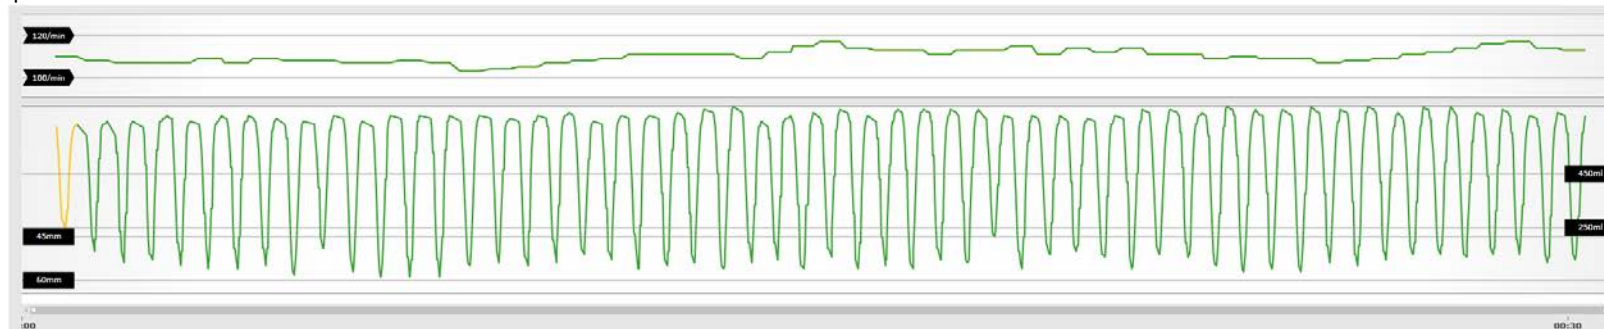

Participant ID: 10, Height 183cm, Weight 78kg, BMI 23kg/cm, age: 20s, sex: male

### walking CPR

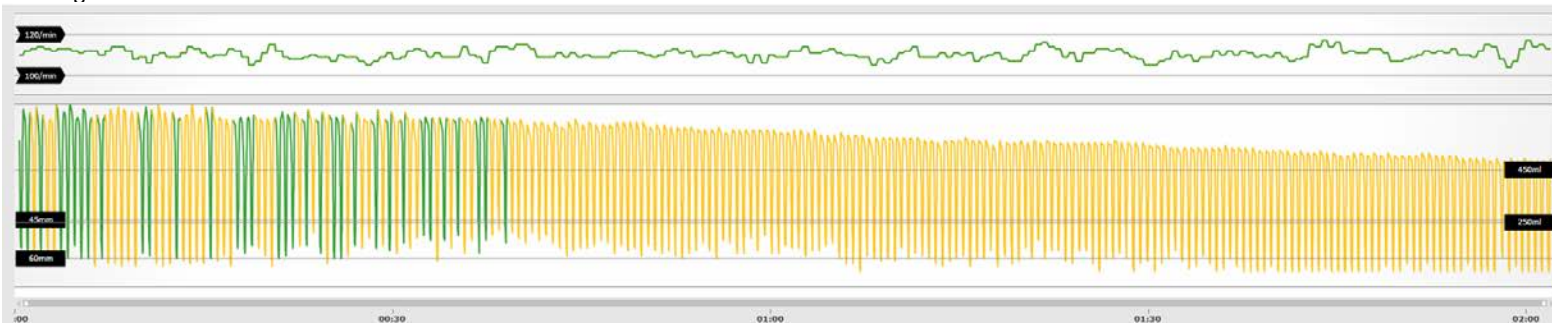

### straddling CPR

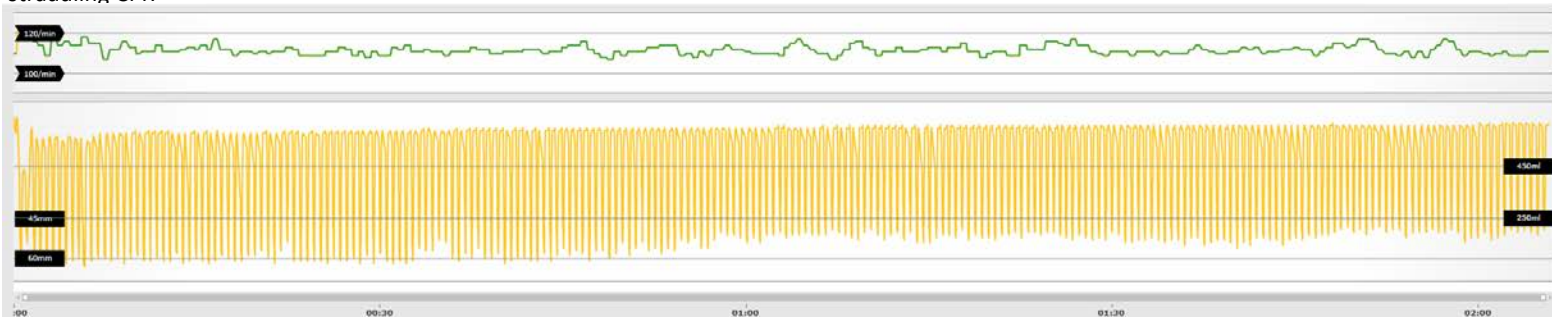

### pretest

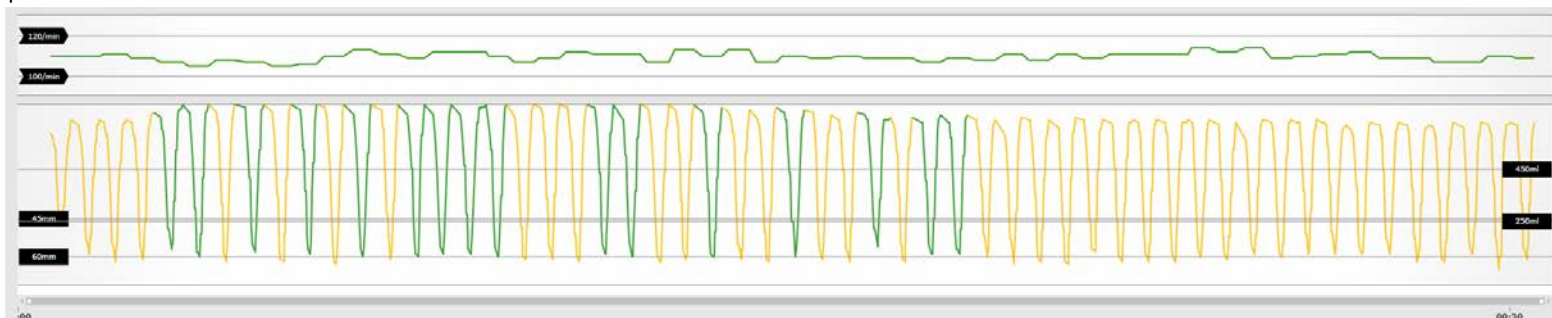

Participant ID: 11, Height 167cm, Weight 60kg, BMI 22kg/cm, age: 60s, sex: male

### walking CPR

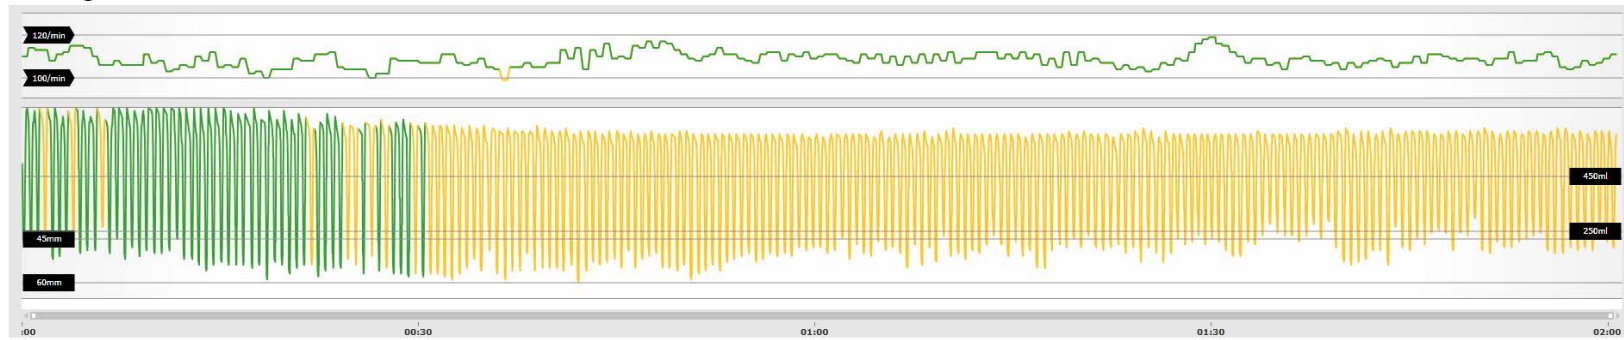

### straddling CPR

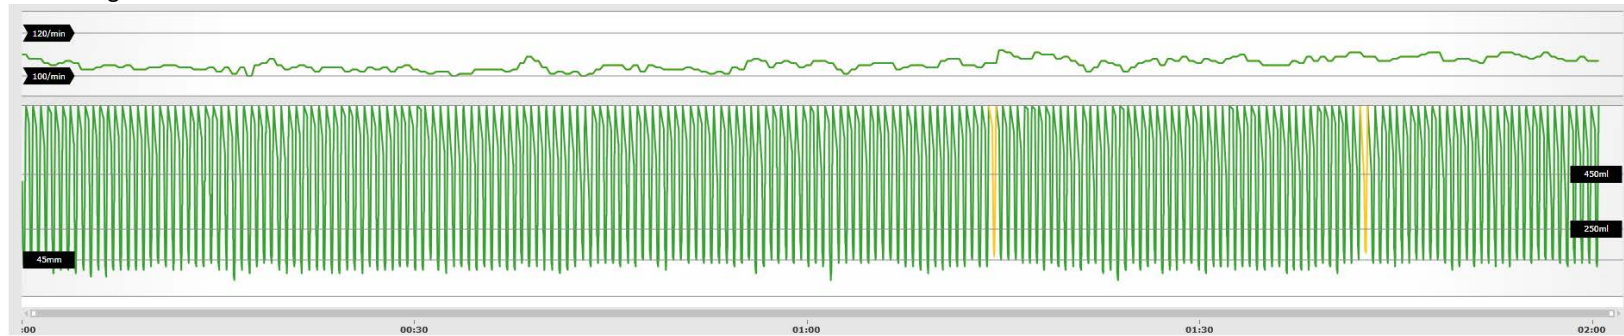

### pretest

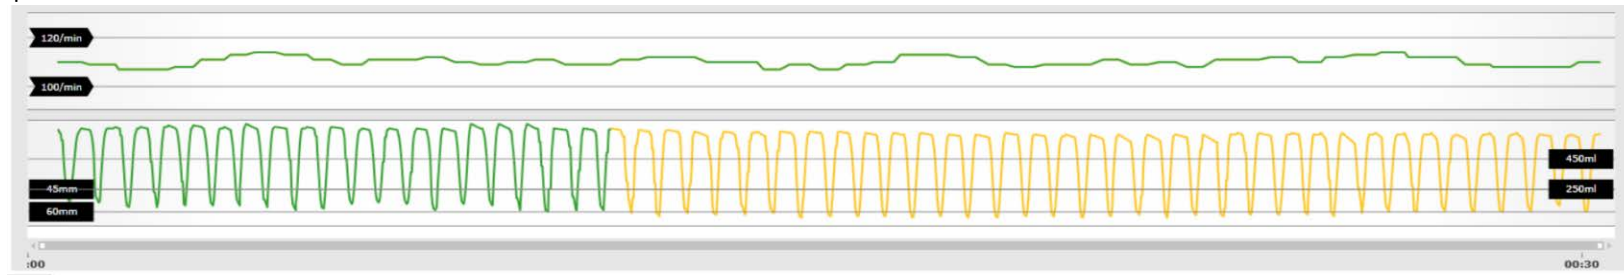

Participant ID: 12, Height 165cm, Weight 58kg, BMI 21kg/cm, age: 30s, sex: male

### walking CPR

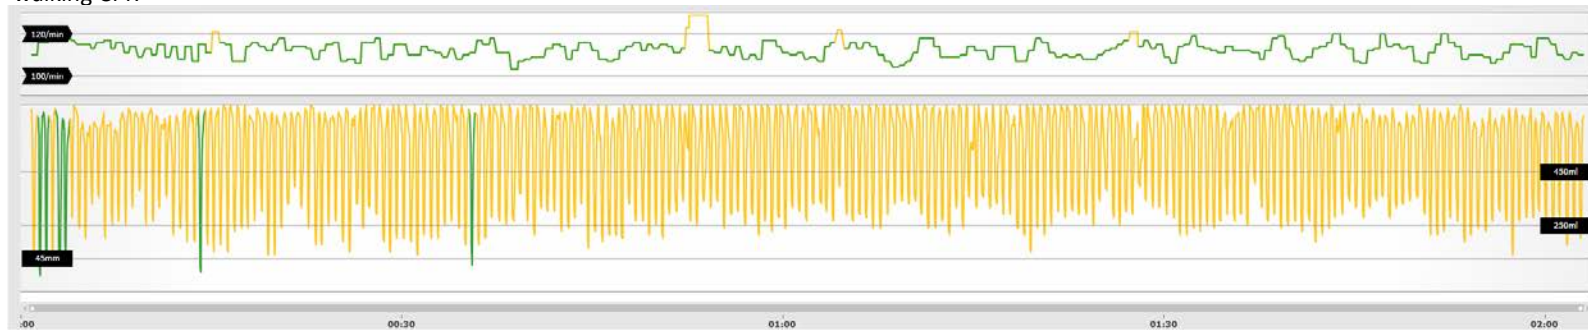

### straddling CPR

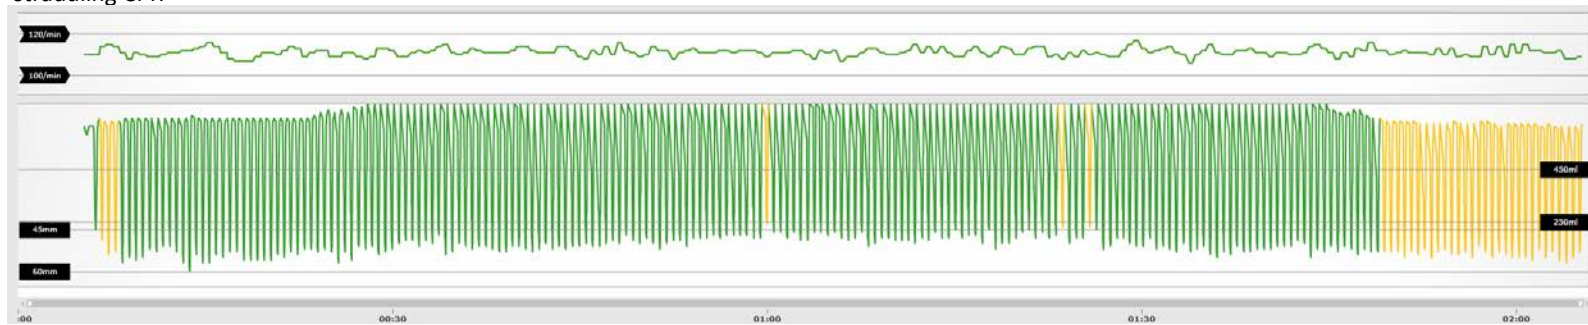

### pretest

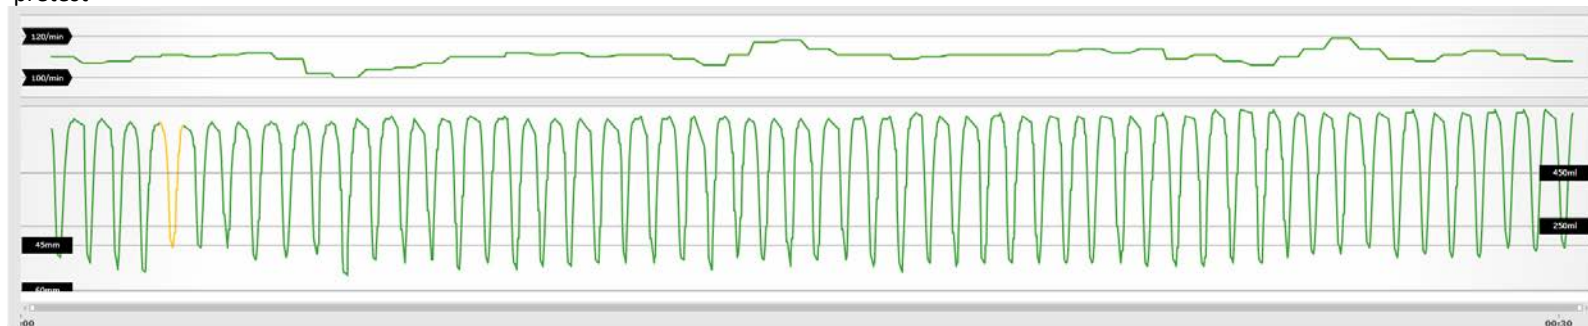

Participant ID: 13, Height 159cm, Weight 52kg, BMI 21kg/cm, age: 30s, sex: female

### walking CPR

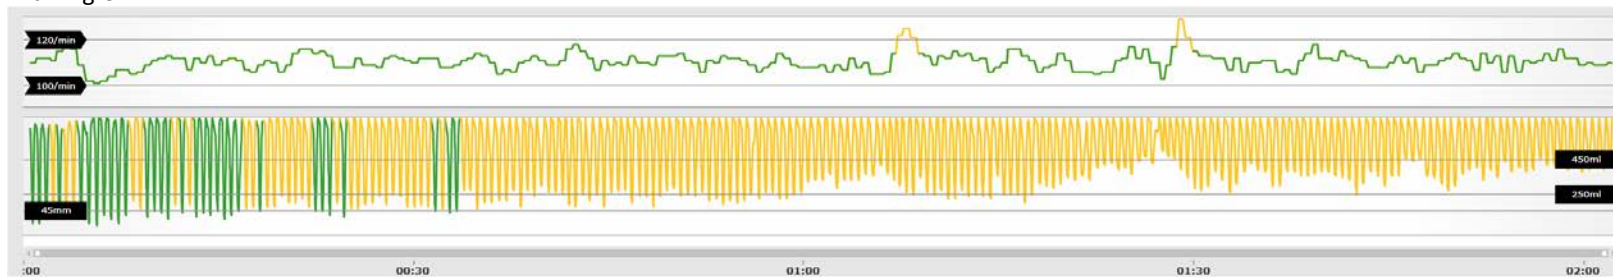

### straddling CPR

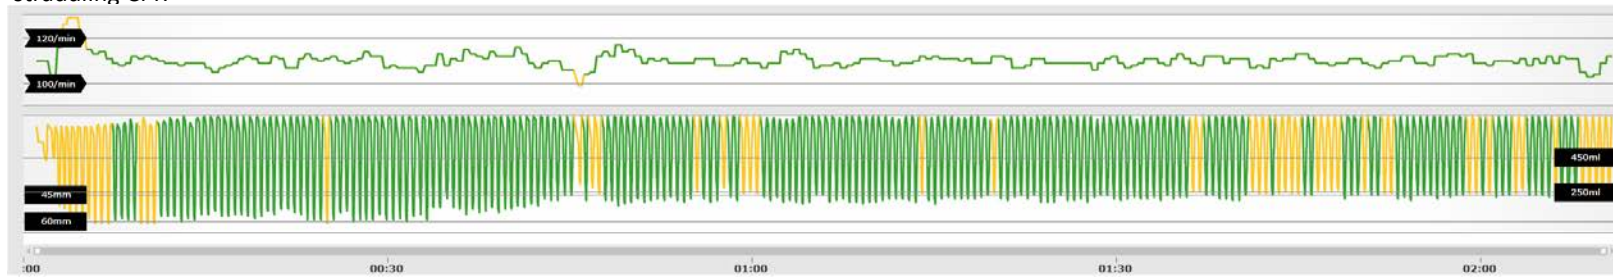

### pretest

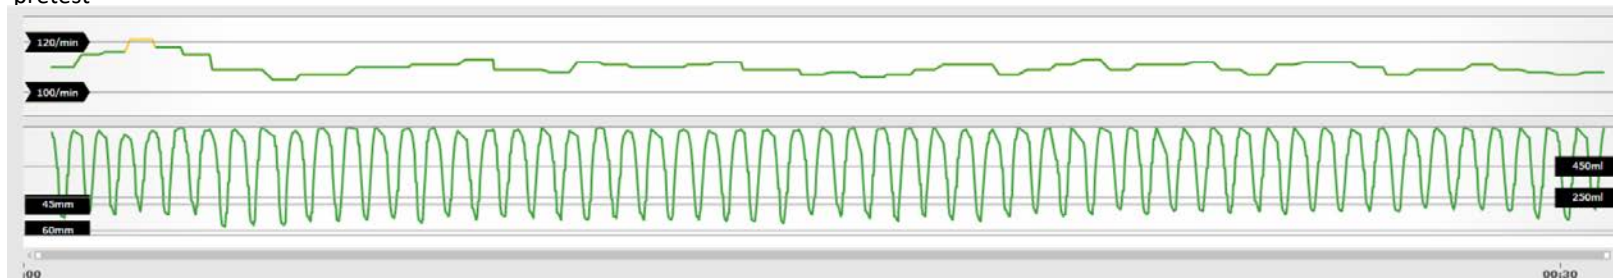

Participant ID: 14, Height 154cm, Weight 68kg, BMI 29kg/cm, age: 40s, sex: female

### walking CPR

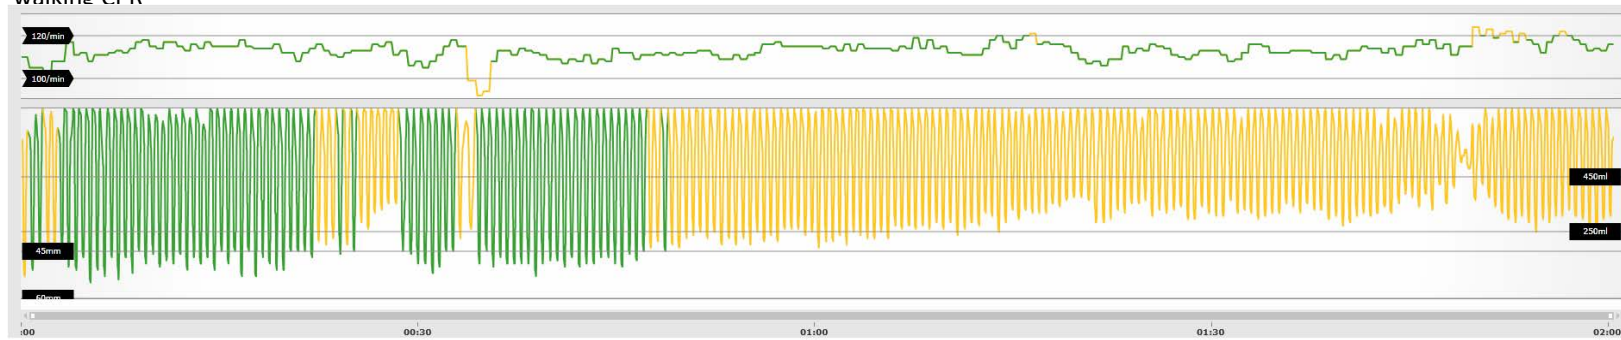

### straddling CPR

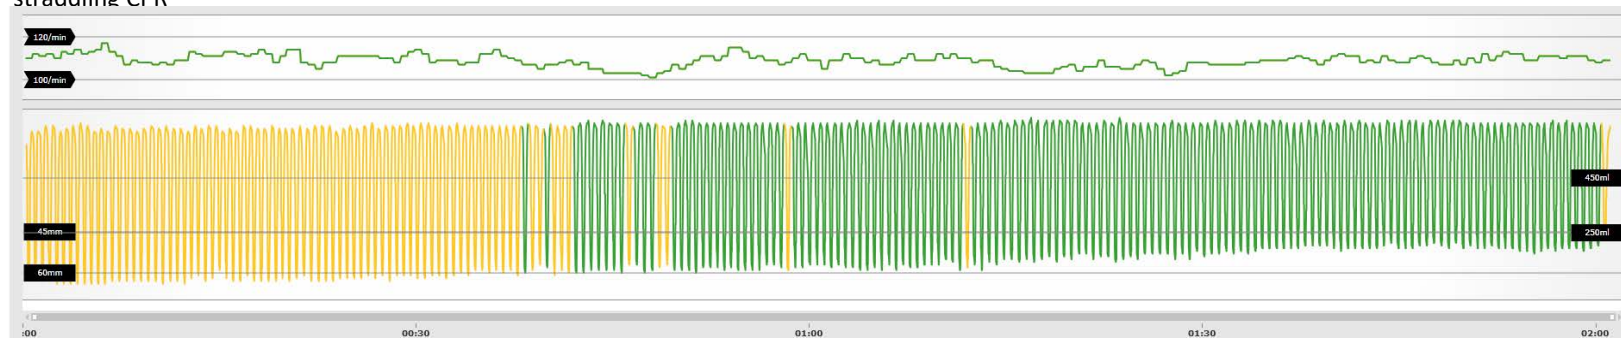

### pretest

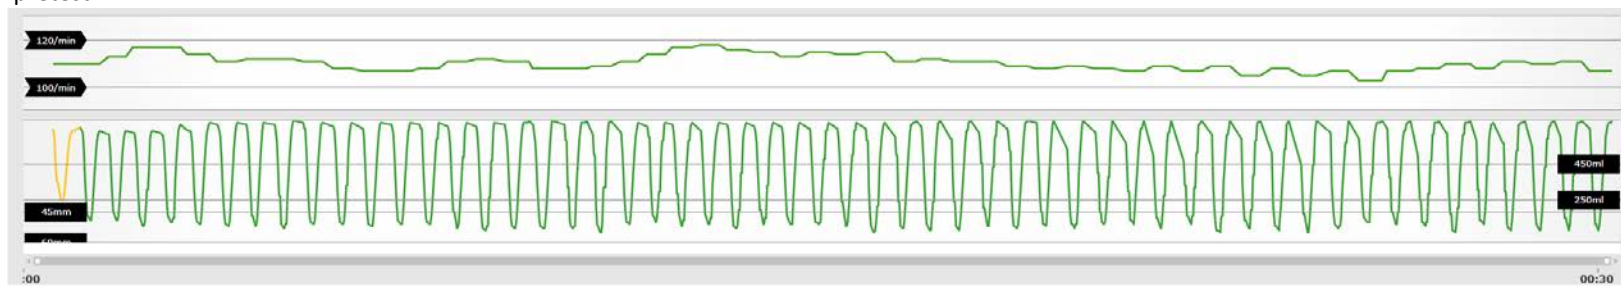

Participant ID: 15, Height 174cm, Weight 74kg, BMI 24kg/cm, age: 20s, sex: male

### walking CPR

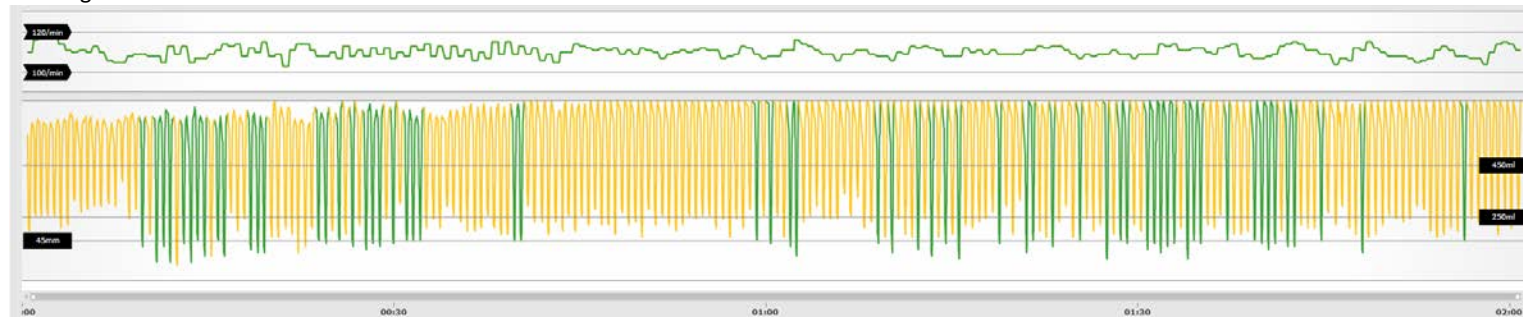

### straddling CPR

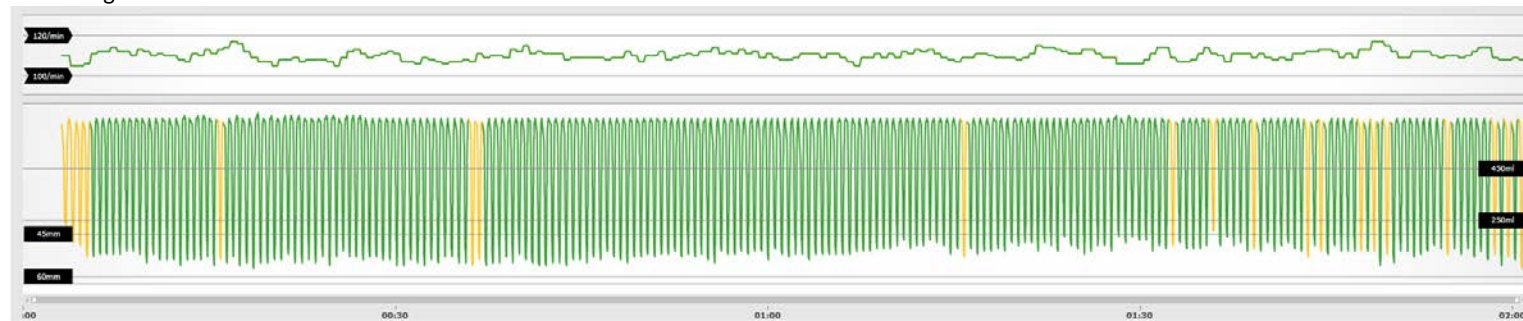

### pretest

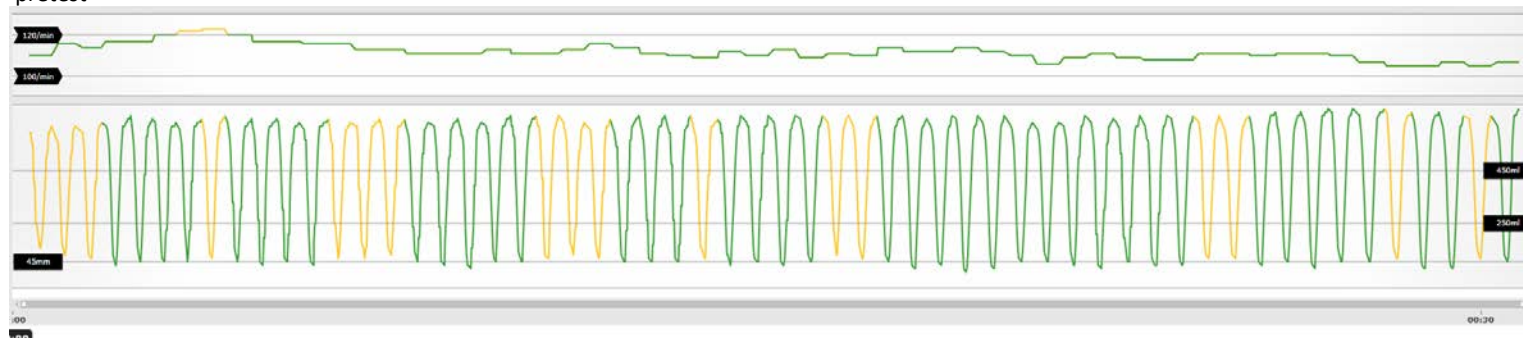

Participant ID: 16, Height 162cm, Weight 67kg, BMI 26kg/cm, age: 40s, sex: female

### walking CPR

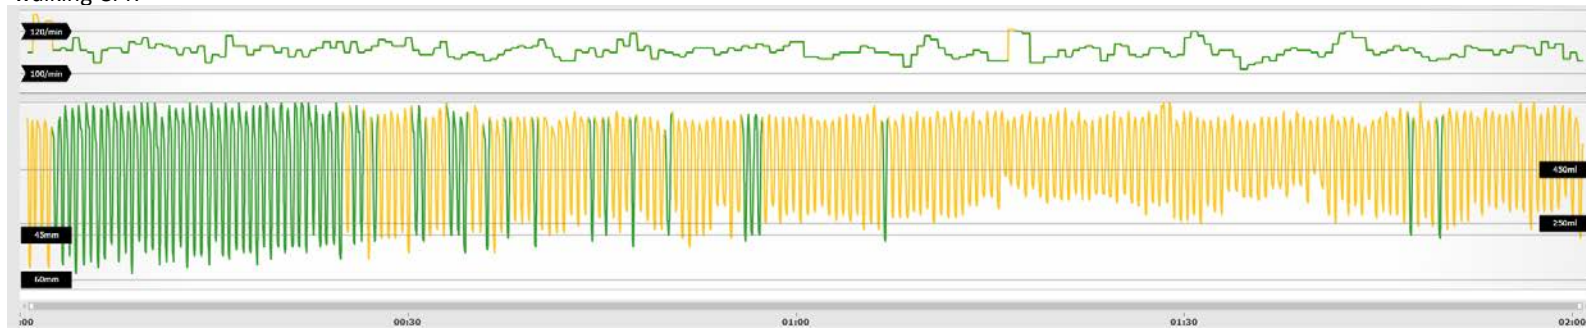

### straddling CPR

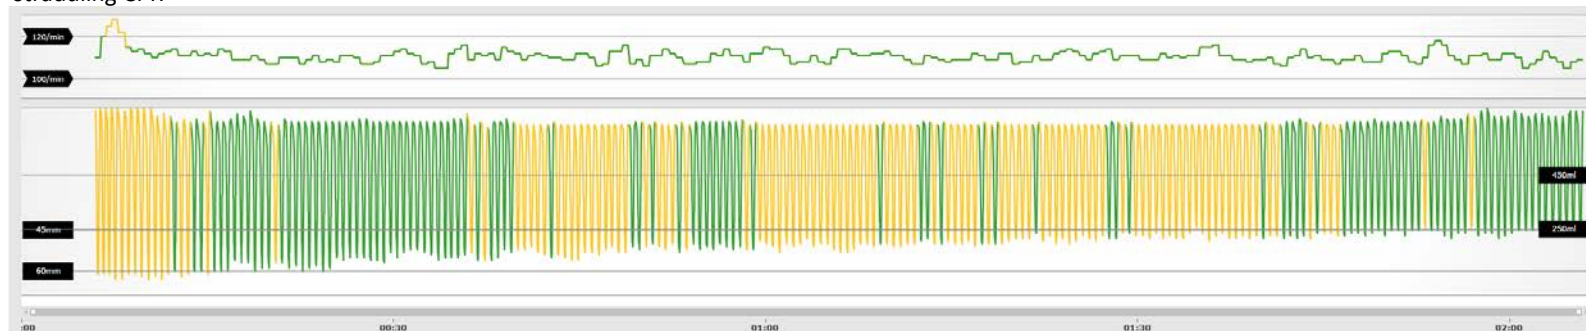

### pretest

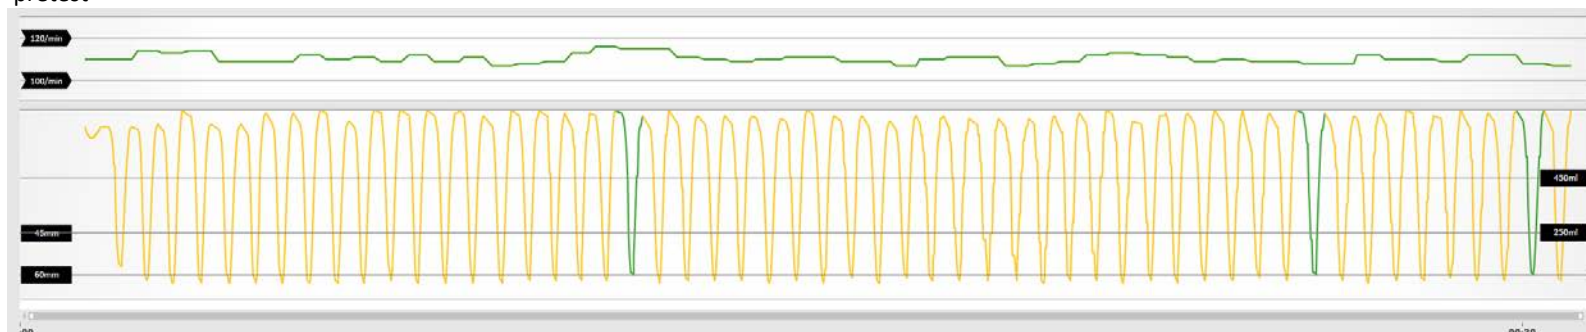



Participant ID: 17, Height 180cm, Weight 75kg, BMI 23kg/cm, age: 30s, sex: male

### walking CPR

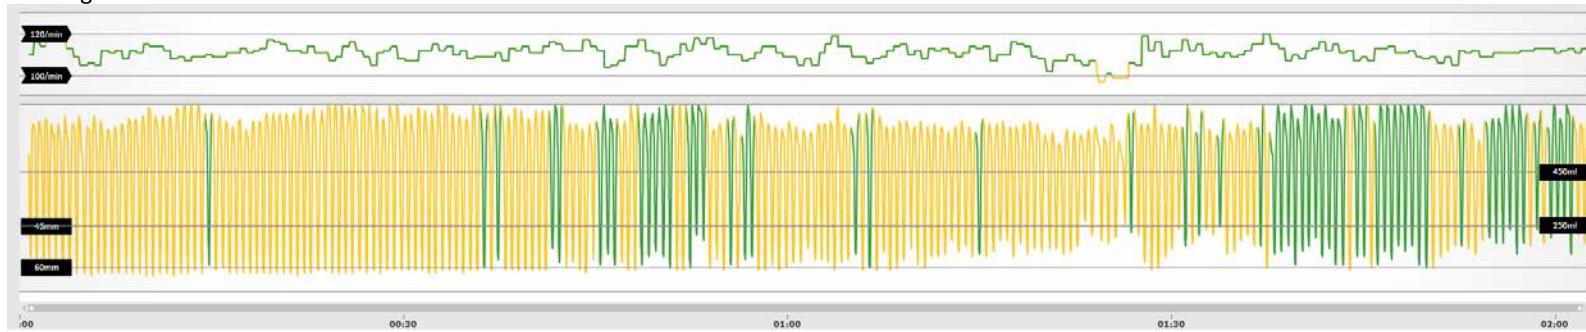

### straddling CPR

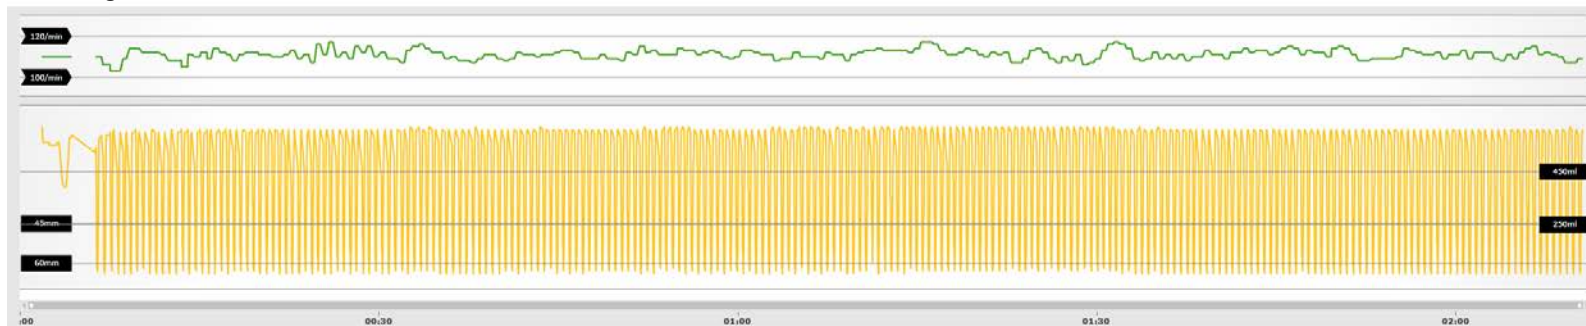

### pretest

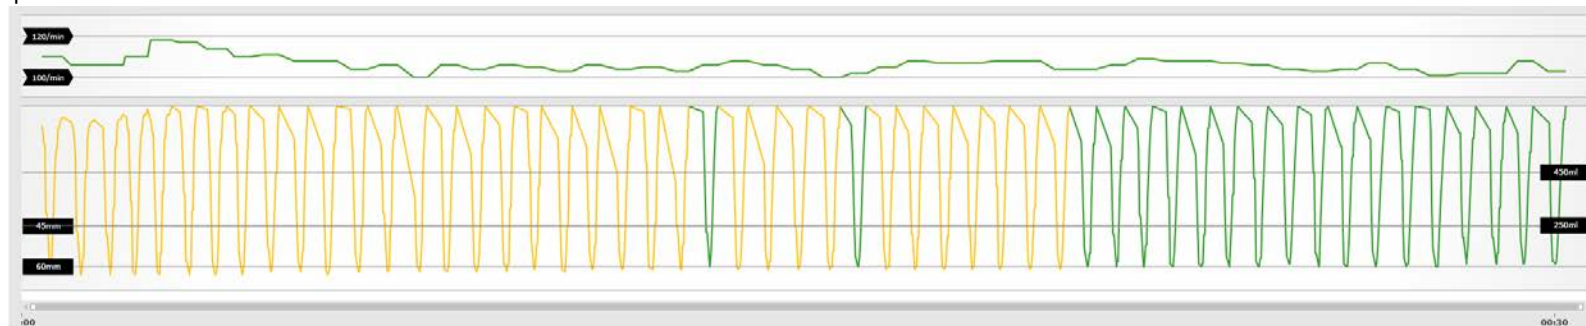

Participant ID: 18, Height 158cm, Weight 62kg, BMI 25kg/cm, age: 50s, sex: female

### walking CPR

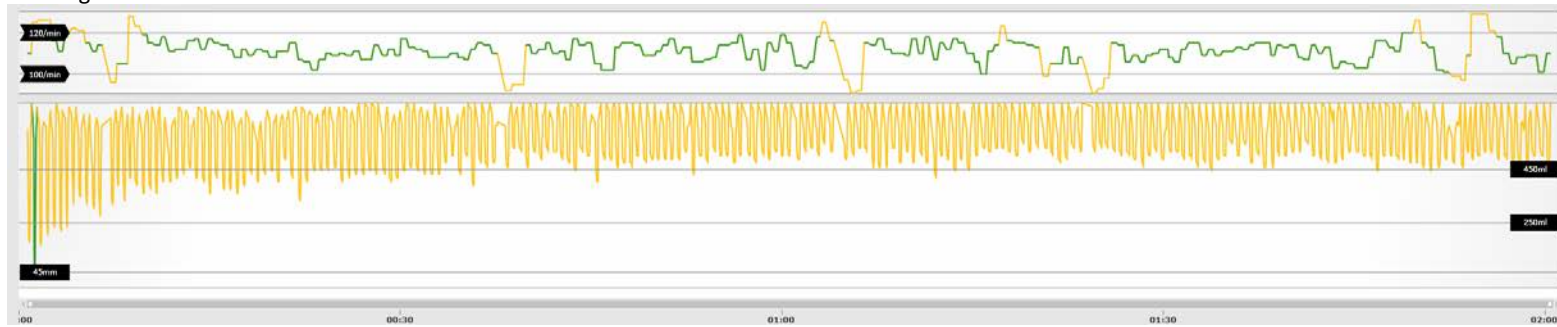

### straddling CPR

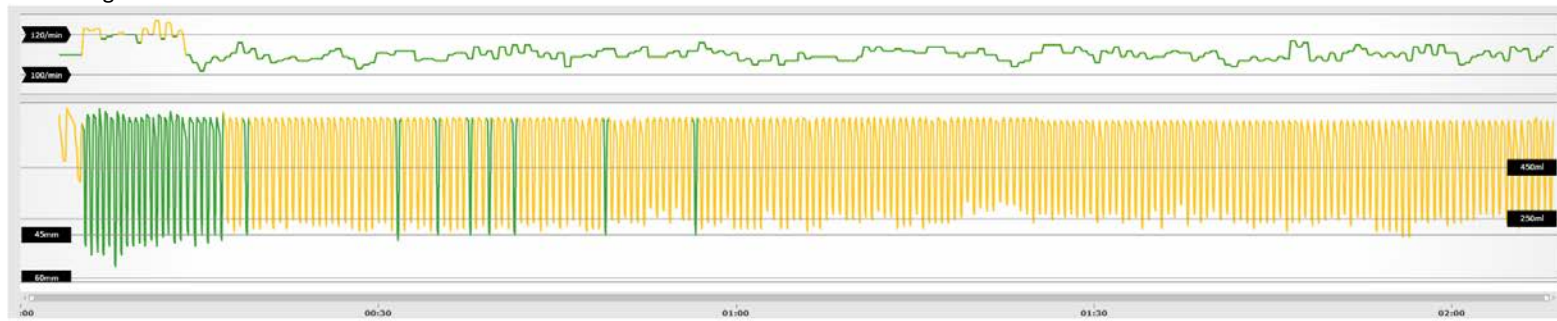

### pretest

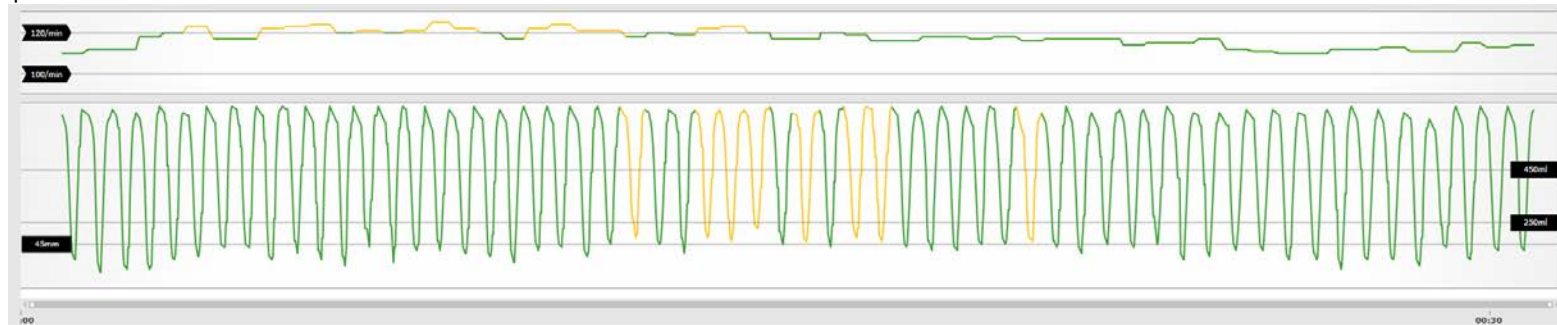

Participant ID: 19, Height 170cm, Weight 70kg, BMI 24kg/cm, age: 20s, sex: male

### walking CPR

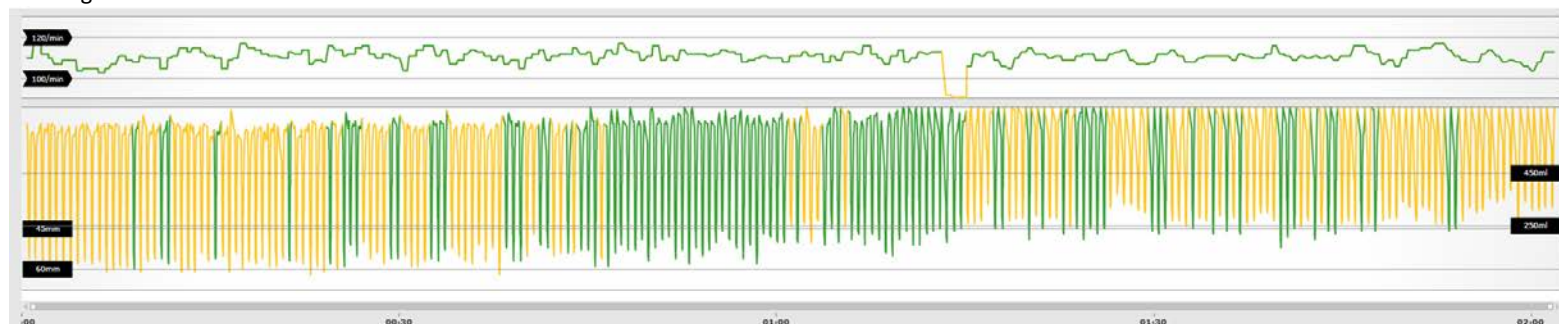

### straddling CPR

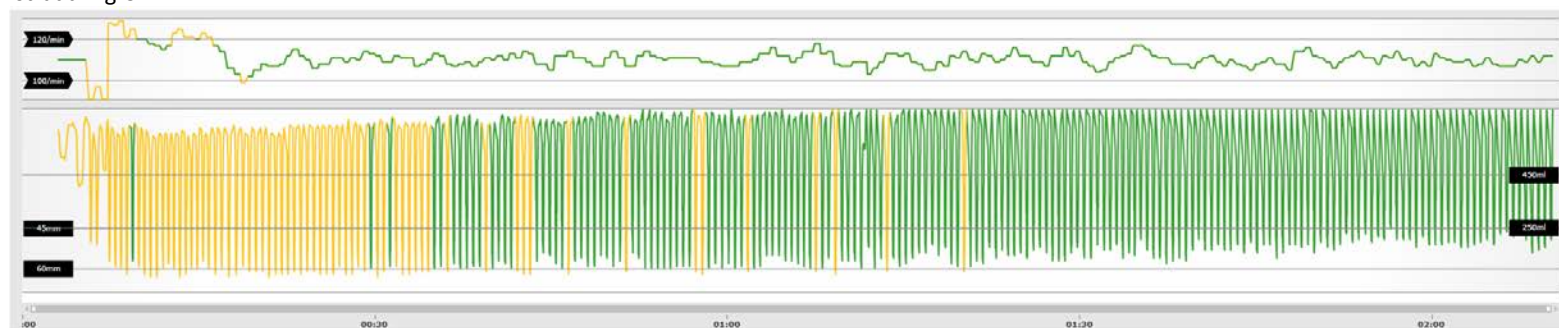

### pretest

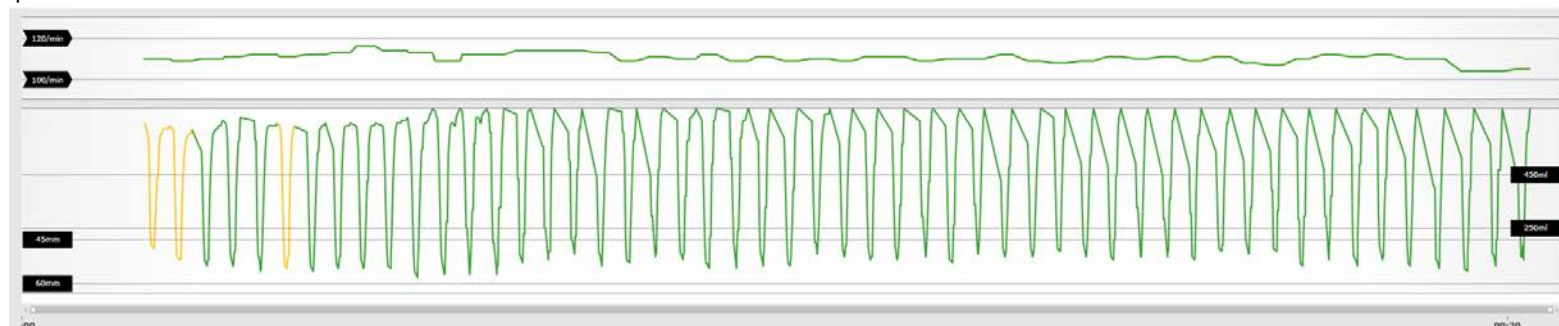

Participant ID: 20, Height 155cm, Weight 68kg, BMI 28kg/cm, age: 30s, sex: female

### walking CPR

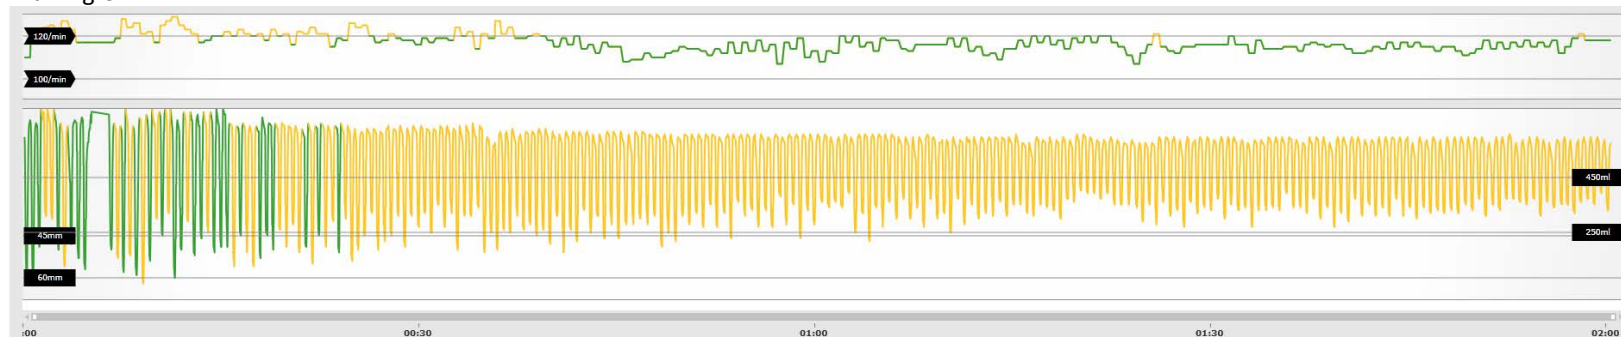

### straddling CPR

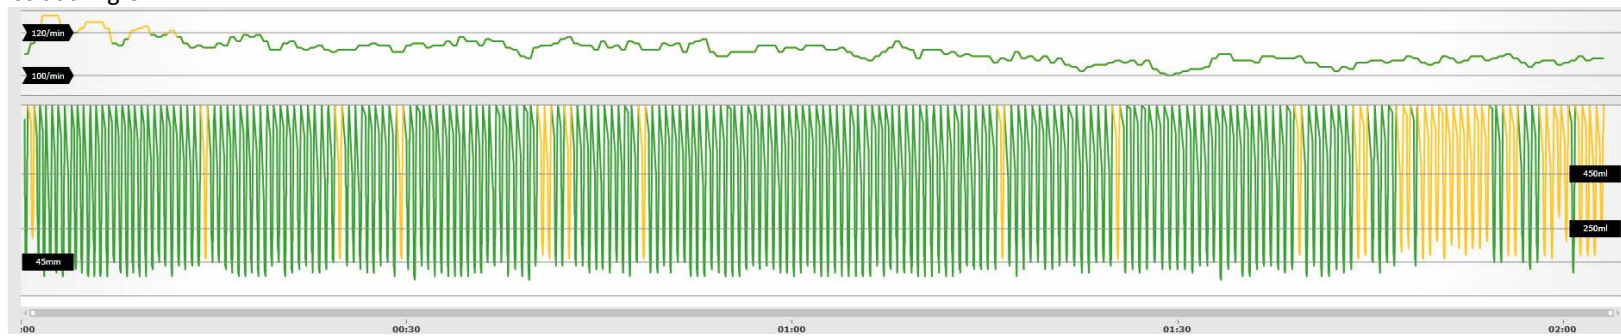

### pretest

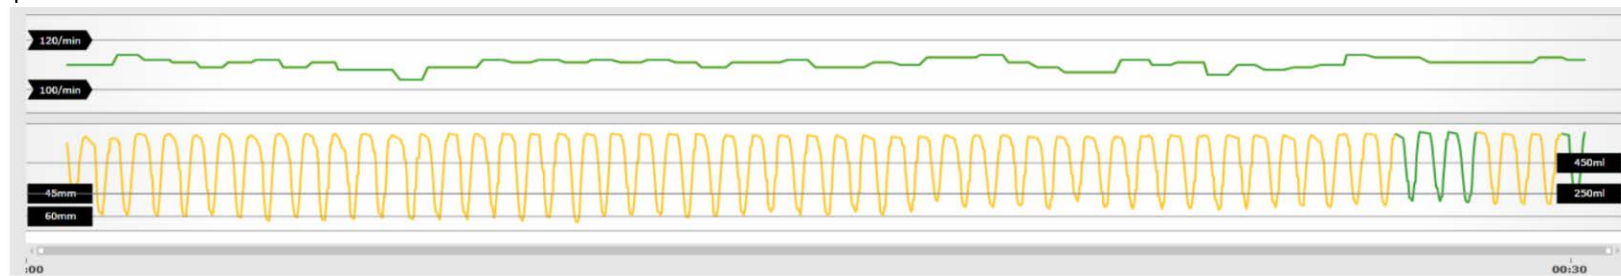

Participant ID: 21, Height 170cm, Weight 55kg, BMI 19kg/cm, age: 40s, sex: female  
excluded as a result of pretest

pretest

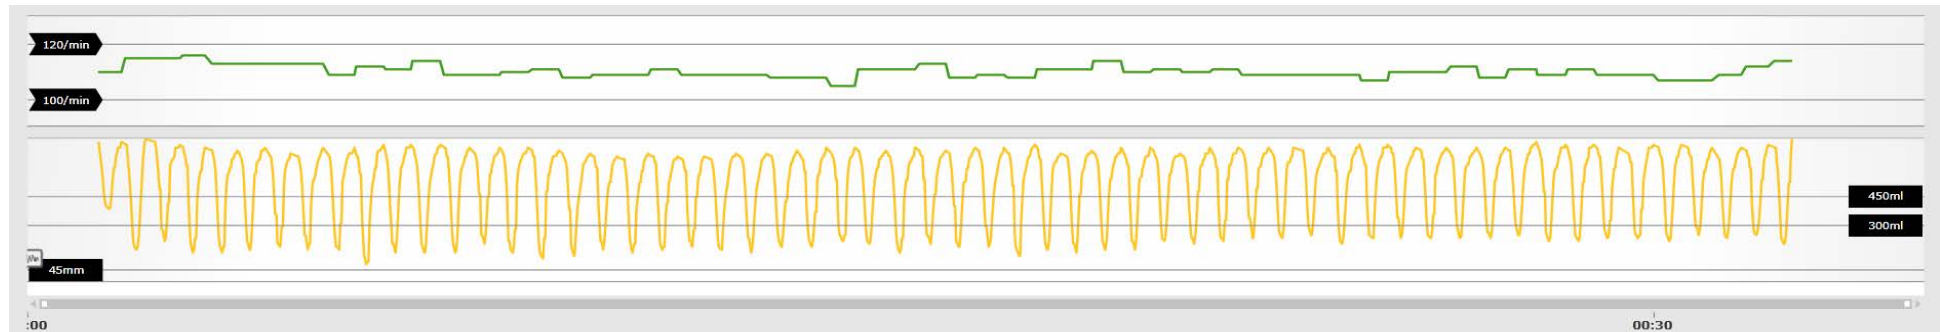

Participant ID: 22, Height 155cm, Weight 45kg, BMI 19kg/cm, age: 20s, sex: female  
excluded as a result of pretest

pretest

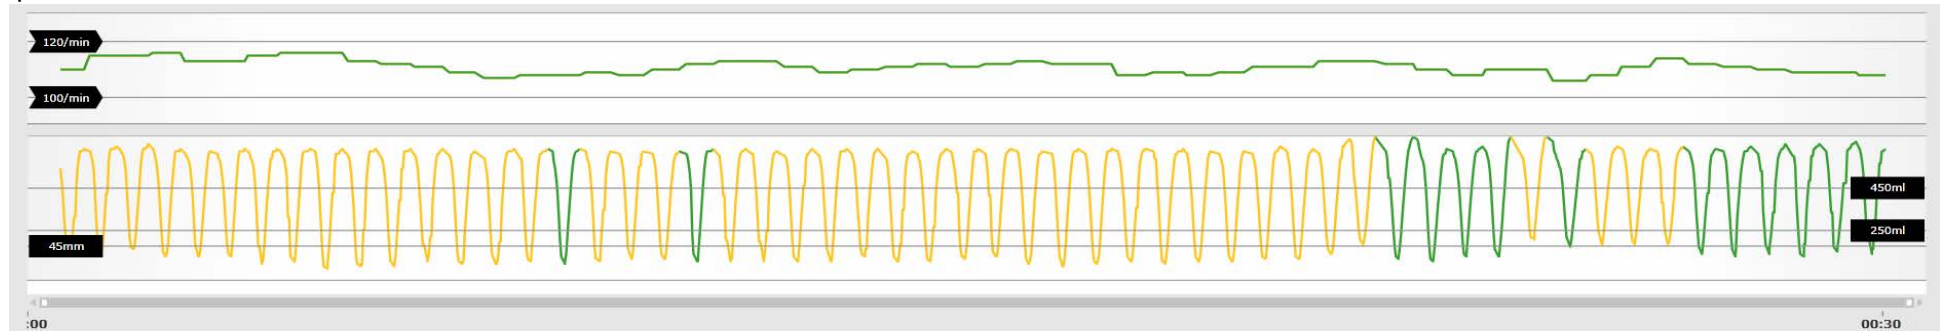

Supplement: pone.0216739.s003.pdf [file pone.0216739.s003.pdf]
